# Supplementary material
Source: HighWire-hosted journal article supplement (doi:10.1101/rna.080744.125)
Supplement: Supplemental_Material.docx [file Supplemental_Material.docx]

**Supplemental Data**

**Miniature NAD+-II riboswitches control bacterial genes for nicotinamide salvage and *de novo* NAD+ biosynthesis**

**CHRISTOPHER G. KING1, KENNY P. CHENG2, and RONALD R. BREAKER1,2**

1Department of Molecular Biophysics and Biochemistry, Yale University, New Haven, Connecticut 06511, USA

2Department of Molecular, Cellular and Developmental Biology, Yale University, New Haven, Connecticut 06520, USA

Corresponding Author: [ronald.breaker@yale.edu](mailto:ronald.breaker@yale.edu)

**Supplemental Fig. 1.** In-line probing assay for the *F. durionis* 60 *pnuC* RNA in the presence of NAD+. Reaction conditions and annotations are as described for **Fig. 2C**.


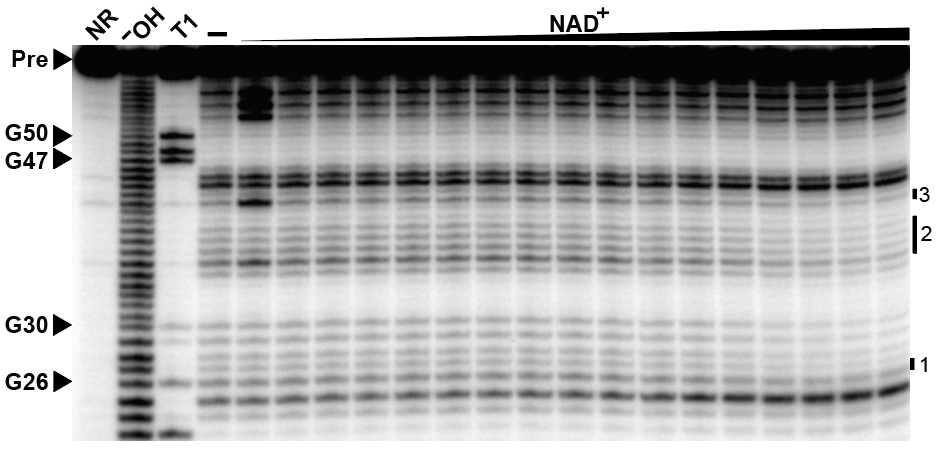


**Supplemental Fig. 2.** Ligand binding analysis of the 70 *pncB* RNA construct, representing a second mini-NAD+-II aptamer. (*A*) Sequence and secondary structure model for the 70 *pncB* RNA construct. Annotations are as described for **Fig. 2A**. (*B*) In-line probing analysis of the 70 *pncB* RNA construct. Annotations are as described for **Fig. 2B**.


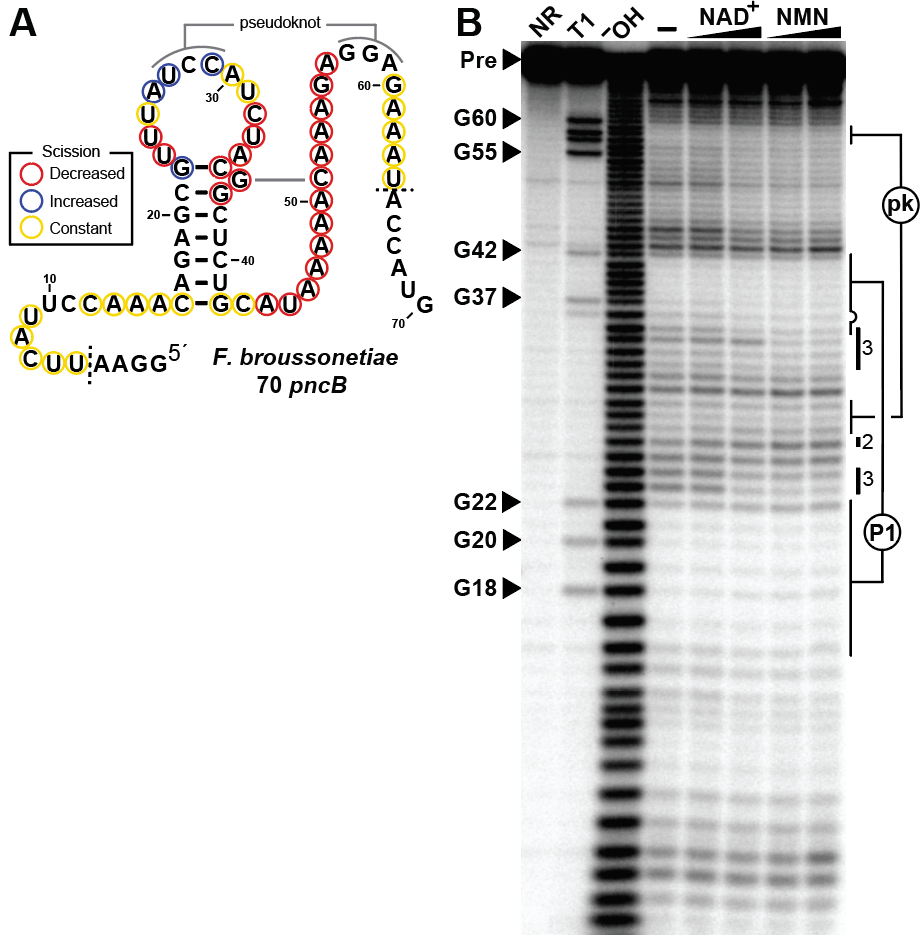


**TABLE S1.** Oligonucleotides used in this study. Bold letters identify nucleotides corresponding to the T7 RNA polymerase promoter.

| Name | Sequence | Purpose |
| --- | --- | --- |
| NAD001 | **TAATACGACTCACTATA**GGAACACATGGTGCGTTGCTTCCGATGACGGCACCTTAAAAACAATAGGAGAACACATATG | Top strand oligonucleotide for the construction of a template for transcription of the *F. durionis* 60 *pnuC* RNA |
| NAD002 | CATATGTGTTCTCCTATTGTTTTTAAGGTGCCGTCATCGGAAGCAACGCACCATGTGTTCC**TATAGTGAGTCGTATTA** | Bottom strand oligonucleotide for the construction of a template for transcription of the *F. durionis* 60 *pnuC* RNA |
| NAD003 | **TAATACGACTCACTATA**GGAATTCATTCCAAACAGAGCGTTTATCCATCTACGGCTCTGCATAAAAACAAAGAGGAGAAATACCATG | Top strand oligonucleotide for the construction of a template for transcription of the *F. broussonetiae* 70 *pncB* RNA |
| NAD004 | CATGGTATTTCTCCTCTTTGTTTTTATGCAGAGCCGTAGATGGATAAACGCTCTGTTTGGAATGAATTCC**TATAGTGAGTCGTATTA** | Bottom strand oligonucleotide for the construction of a template for transcription of the *F. broussonetiae* 70 *pncB* RNA |
